## CORRECTION

# Correction: Enrollment in HIV Care Two Years after HIV Diagnosis in the Kingdom of Swaziland: An Evaluation of a National Program of New Linkage Procedures

The *PLOS ONE* Staff

The caption for [Table 1](#), “Clisssent and referral facility characteristics, by study-gender group,” should be “Client and referral facility characteristics, by study-gender group.” The publisher apologizes for the error. Please see [Table 1](#) with the correct caption here.

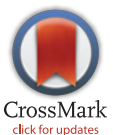 OPEN ACCESS

**Citation:** The *PLOS ONE* Staff (2016) Correction: Enrollment in HIV Care Two Years after HIV Diagnosis in the Kingdom of Swaziland: An Evaluation of a National Program of New Linkage Procedures. *PLoS ONE* 11(3): e0152108. doi:10.1371/journal.pone.0152108

**Published:** March 17, 2016

**Copyright:** © 2016 The PLOS ONE Staff. This is an open access article distributed under the terms of the [Creative Commons Attribution License](#), which permits unrestricted use, distribution, and reproduction in any medium, provided the original author and source are credited.

**Table 1. Client and referral facility characteristics, by study-gender group.**

| Characteristic                                            | SHIMS Female (N = 494) | SHIMS Male (N = 294) | SOKA Male (N = 317) | All Clients (N = 1105) |
|-----------------------------------------------------------|------------------------|----------------------|---------------------|------------------------|
| Age at diagnosis, median (Q1-Q3)                          | 26 (22–33)             | 32 (27–38)           | 29 (25–35)          | 29 (24–35)             |
| Age at diagnosis (years)                                  |                        |                      |                     |                        |
| <25                                                       | 204 (41.3%)            | 37 (12.6%)           | 58 (18.3%)          | 299 (27.1%)            |
| 25–29                                                     | 122 (24.7%)            | 72 (24.5%)           | 105 (33.1%)         | 299 (27.1%)            |
| 30–35                                                     | 81 (16.4%)             | 84 (28.6%)           | 87 (27.4%)          | 252 (22.8%)            |
| >35                                                       | 87 (17.6%)             | 101 (34.4%)          | 67 (21.1%)          | 255 (23.1%)            |
| Region of referral facility                               |                        |                      |                     |                        |
| Hhohho                                                    | 148 (30.0%)            | 101 (34.4%)          | 102 (32.2%)         | 351 (31.8%)            |
| Lubombo                                                   | 83 (16.8%)             | 51 (17.3%)           | 38 (12.0%)          | 172 (15.6%)            |
| Manzini                                                   | 135 (27.3%)            | 81 (27.6%)           | 126 (39.7%)         | 342 (31.0%)            |
| Shiselweni                                                | 128 (25.9%)            | 61 (20.7%)           | 51 (16.1%)          | 240 (21.7%)            |
| Type of referral facility                                 |                        |                      |                     |                        |
| Government (non-military)                                 | 369 (74.7%)            | 231 (78.6%)          | 189 (59.6%)         | 789 (71.4%)            |
| Faith-based                                               | 91 (18.4%)             | 39 (13.3%)           | 23 (7.3%)           | 153 (13.8%)            |
| Private                                                   | 24 (4.9%)              | 15 (5.1%)            | 46 (14.5%)          | 85 (7.7%)              |
| Non-governmental Organization                             | 8 (1.6%)               | 4 (1.4%)             | 46 (14.5%)          | 58 (5.2%)              |
| Military                                                  | 2 (0.4%)               | 5 (1.7%)             | 13 (4.1%)           | 20 (1.8%)              |
| Class of referral facility                                |                        |                      |                     |                        |
| Hospital                                                  | 166 (33.6%)            | 109 (37.1%)          | 105 (33.1%)         | 380 (34.4%)            |
| Health Center                                             | 92 (18.6%)             | 43 (14.6%)           | 36 (11.4%)          | 171 (15.5%)            |
| Clinic                                                    | 227 (46.0%)            | 137 (46.6%)          | 160 (50.5%)         | 524 (47.4%)            |
| Public Health Unit                                        | 9 (1.8%)               | 5 (1.7%)             | 16 (5.0%)           | 30 (2.7%)              |
| Location of referral facility                             |                        |                      |                     |                        |
| Urban                                                     | 176 (35.6%)            | 110 (37.4%)          | 188 (59.3%)         | 474 (42.9%)            |
| Peri-urban                                                | 66 (13.4%)             | 56 (19.0%)           | 45 (14.2%)          | 167 (15.1%)            |
| Rural                                                     | 252 (51.0%)            | 128 (43.5%)          | 84 (26.5%)          | 464 (42.0%)            |
| Referral facility on a paved road                         | 370 (74.9%)            | 217 (73.8%)          | 292 (92.1%)         | 879 (79.5%)            |
| Days per week HIV services provided                       |                        |                      |                     |                        |
| Monday–Friday                                             | 353 (71.5%)            | 217 (73.8%)          | 232 (73.2%)         | 802 (72.6%)            |
| Monday–Saturday                                           | 90 (18.2%)             | 45 (15.3%)           | 61 (19.2%)          | 196 (17.7%)            |
| Monday–Sunday                                             | 51 (10.3%)             | 32 (10.9%)           | 24 (7.6%)           | 107 (9.7%)             |
| Change in days per week facility is open since March 2011 |                        |                      |                     |                        |
| Increase                                                  | 137 (27.7%)            | 96 (32.7%)           | 119 (37.5%)         | 352 (31.9%)            |
| Decrease                                                  | 31 (6.3%)              | 28 (9.5%)            | 26 (8.2%)           | 85 (7.7%)              |
| No change                                                 | 326 (66.0%)            | 170 (57.8%)          | 172 (54.3%)         | 668 (60.5%)            |
| Providers per HIV-clinic day, median(Q1–Q3)               |                        |                      |                     |                        |
| Doctors                                                   | 1 (1–2)                | 1 (1–2)              | 1 (1–2)             | 1 (1–2)                |
| Nurses                                                    | 4 (2–6)                | 5 (2–6)              | 6 (4–8)             | 5 (2–6)                |
| Counselors                                                | 0 (0–1)                | 0 (0–1)              | 0 (0–1)             | 0 (0–1)                |
| Lay Counselors                                            | 0 (0–1)                | 0 (0–1)              | 0 (0–1)             | 0 (0–1)                |
| Expert Clients                                            | 2 (2–3)                | 2 (2–3)              | 2 (1–3)             | 2 (2–3)                |
| All cadres combined                                       | 8 (6–13)               | 9 (6–13)             | 10 (6–13)           | 9 (6–13)               |
| ART initiated at referral facility <sup>a</sup>           | 487 (98.6%)            | 289 (98.3%)          | 314 (99.1%)         | 1090 (98.6%)           |
| ART refills provided at referral facility                 | 494 (100%)             | 294 (100%)           | 317 (100%)          | 1105 (100%)            |
| Providers who initiate ART                                |                        |                      |                     |                        |
| Doctor only                                               | 57 (11.5%)             | 29 (9.9%)            | 25 (7.9%)           | 111 (10.0%)            |

(Continued)

Table 1. (Continued)

| Characteristic                                                    | SHIMS Female (N = 494) | SHIMS Male (N = 294) | SOKA Male (N = 317) | All Clients (N = 1105) |
|-------------------------------------------------------------------|------------------------|----------------------|---------------------|------------------------|
| Nurse only                                                        | 153 (31.0%)            | 97 (33.0%)           | 94 (29.7%)          | 344 (31.1%)            |
| Doctor and Nurse                                                  | 277 (56.1%)            | 163 (55.4%)          | 195 (61.5%)         | 635 (57.5%)            |
| N/A                                                               | 7 (1.4%)               | 5 (1.7%)             | 3 (0.9%)            | 15 (1.4%)              |
| Phone available to implement Linkage SOP <sup>b</sup>             | 465 (94.1%)            | 279 (94.9%)          | 312 (98.4%)         | 1056 (95.6%)           |
| Monthly credit available to implement Linkage SOP, median (Q1-Q3) | SZL 150 (150–200)      | SZL 150 (150–200)    | SZL 150 (150–300)   | SZL 150 (150–200)      |
| Staff responsible for calling defaulters <sup>c</sup>             |                        |                      |                     |                        |
| Doctors                                                           | 0 (0.0%)               | 0 (0.0%)             | 0 (0.0%)            | 0 (0.0%)               |
| Nurses                                                            | 239 (48.4%)            | 141 (48.0%)          | 200 (63.1%)         | 580 (52.5%)            |
| Counselors                                                        | 8 (1.6%)               | 12 (4.1%)            | 13 (4.1%)           | 33 (3.0%)              |
| Lay Counselor/EC                                                  | 321 (65.0%)            | 194 (66.0%)          | 188 (59.3%)         | 703 (63.6%)            |

<sup>a</sup>At the time of this study, Swaziland national treatment guidelines recommended ART initiation at CD4 < 350 cells/μl.

<sup>b</sup>Patient linkage, retention, and follow-up in HIV care standard operating procedures, Swaziland National AIDS Programme, 2012.

<sup>c</sup>More than one cadre could be responsible for calling clients who defaulted from their first or subsequent appointment to the HIV facility, in accordance with the Linkage SOP.

doi:10.1371/journal.pone.0152108.t001

## Reference

1. MacKellar DA, Williams D, Storer N, Okello V, Azih C, Drummond J, et al. (2016) Enrollment in HIV Care Two Years after HIV Diagnosis in the Kingdom of Swaziland: An Evaluation of a National Program of New Linkage Procedures. PLoS ONE 11(2): e0150086. doi:[10.1371/journal.pone.0150086](https://doi.org/10.1371/journal.pone.0150086) PMID: [26910847](https://pubmed.ncbi.nlm.nih.gov/26910847/)
